# Supplementary material for: Trans-scale relationship analysis between the pore structure and macro parameters of backfill and slurry
Source: R Soc Open Sci. 2019 Jun 26;6(6):190389. doi: 10.1098/rsos.190389 (PMC6599773; doi:10.1098/rsos.190389)
Supplement: Flowability of the filling slurry [file rsos190389supp2.xlsx]

## Sheet: Figure 3's data
Table 2 Flowability of the filling slurry (Figure 3)
Name	Shear time	Apparent viscosity	Apparent viscosity	Apparent viscosity	Apparent viscosity	Shear time	Apparent viscosity	Apparent viscosity	Apparent viscosity	Apparent viscosity
Unit	s	Pa·s	Pa·s	Pa·s	Pa·s	s	Pa·s	Pa·s	Pa·s	Pa·s
Comment		A1	A2	A3	A4	B1	B1	B2	B3	B4
1	1.34255	164.946	143.92	125.38	113.856	1.81866	663.621	552.663	447.14	381.241
2	14.1194	161.211	140.959	123.203	112.143	14.3646	641.989	533.722	432.683	368.631
3	28.9107	158.095	138.308	120.552	110.585	30.7535	623.047	519.265	414.639	356.02
4	42.666	155.134	136.13	118.994	108.718	45.2774	605.9	503.067	405.616	346.101
5	58.4357	153.112	133.953	117.126	107.469	60.7056	591.443	490.404	395.697	337.976
6	73.1694	150.306	131.767	115.104	106.376	76.1337	576.142	477.794	383.087	331.645
7	88.939	147.81	129.744	114.165	105.447	90.6576	563.479	467.875	376.756	326.21
8	104.709	145.632	128.186	112.608	105.447	104.164	549.075	457.956	367.734	322.622
9	119.442	143.92	127.248	111.669	105.447	120.553	538.207	448.934	363.196	322.622
10	134.234	142.207	126.164	111.669	105.283	136.999	531.031	444.396	358.711	319.931
11	149.946	140.02	125.535	111.205	105.128	150.505	518.368	438.118	357.814	321.725
12	163.759	138.781	124.606	110.74	104.818	165.99	512.986	436.271	355.071	322.622
13	181.485	137.533	124.132	110.895	104.818	181.418	503.964	430.889	355.071	322.622
14	195.24	136.44	123.513	110.895	104.818	193.964	499.427	430.889	353.277	322.622
15	211.01	135.666	123.358	110.895	104.818	210.409	492.198	426.352	351.483	322.622
16	224.765	134.882	122.893	110.74	104.973	223.916	487.714	425.455	355.071	322.622
17	240.535	134.572	122.729	110.74	104.973	240.305	487.714	425.455	355.071	323.519
18	253.312	134.572	122.729	110.74	104.973	254.829	487.714	425.455	354.174	323.519
19	270.06	134.418	122.729	110.585	104.973	270.257	487.714	424.558	354.174	323.519
20	283.815	134.418	122.729	110.43	104.973	284.724	487.714	424.558	354.174	322.622
21	299.585	134.108	122.729	110.43	104.818	300.209	486.817	424.558	355.071	323.519
22	314.319	134.263	122.729	110.43	104.973	313.716	486.817	424.558	355.071	321.725
23	330.088	134.418	122.893	110.43	104.663	329.144	487.714	424.558	354.174	322.622
24	343.844	134.418	123.048	110.43	105.283	343.668	487.714	424.558	354.174	322.622
25	359.613	134.418	122.729	110.43	105.128	361.017	486.817	424.558	356.02	322.622
26	375.383	134.263	123.203	110.585	105.128	375.541	486.817	425.455	353.277	321.725
27	389.138	134.108	123.048	110.585	105.128	390.969	486.817	425.455	356.02	322.622
28	406.865	134.108	123.048	110.43	105.128	404.476	486.817	425.455	354.174	323.519
29	418.663	134.108	122.729	110.43	105.128	419.961	486.817	425.455	354.174	323.519
30	434.433	134.263	122.729	110.43	104.973	434.428	485.92	425.455	355.071	322.622
31	450.145	134.263	122.729	110.43	104.973	450.874	485.92	424.558	355.071	321.725
32	465.915	134.418	122.729	110.275	104.973	464.38	486.817	425.455	355.071	321.725
33	480.706	134.572	122.729	110.275	104.818	480.769	486.817	426.352	354.174	322.622
34	495.44	134.263	122.729	110.275	104.973	496.254	485.92	425.455	355.071	321.725
35	510.231	134.263	122.729	110.43	105.128	509.76	485.92	427.249	356.02	321.725
36	525.943	134.263	122.729	110.275	105.128	524.228	485.92	425.455	354.174	322.622
37	540.734	134.263	122.893	110.43	104.818	540.673	487.714	425.455	355.071	322.622
38	555.468	134.263	122.893	110.43	104.818	554.18	486.817	424.558	355.071	322.622
39	570.259	134.263	122.893	110.43	104.818	568.647	486.817	424.558	356.02	323.519
40	584.015	134.418	122.893	110.43	104.973	584.132	485.92	425.455	356.02	322.622
41	596.849	134.418	122.893	110.43	104.973	597.639	485.92	426.352	355.071	321.725
