# Supplementary material for: Trans-scale relationship analysis between the pore structure and macro parameters of backfill and slurry
Source: R Soc Open Sci. 2019 Jun 26;6(6):190389. doi: 10.1098/rsos.190389 (PMC6599773; doi:10.1098/rsos.190389)
Supplement: Particle size distribution of the raw materials [file rsos190389supp1.xlsx]

## Sheet: Figure 1's data
Table 1 Particle size distribution of the raw materials (Figure 1)
Name	Particle size	Volume ratio	Volume ratio	Volume ratio
Unit	μm	%	%	%
Comment		Limestone powder	Tailings A	Tailings B
1	0.02	0	0
2	0.022	0	0	0
3	0.025	0	0	0
4	0.028	0	0	0
5	0.032	0	0	0
6	0.036	0	0	0
7	0.04	0	0	0
8	0.045	0	0	0
9	0.05	0	0	0
10	0.056	0	0	0
11	0.063	0	0	0
12	0.071	0	0	0
13	0.08	0	0	0
14	0.089	0	0	0
15	0.1	0	0	0
16	0.112	0	0	0
17	0.126	0	0	0
18	0.142	0	0	0
19	0.159	0	0	0
20	0.178	0	0	0
21	0.2	0	0	0
22	0.224	0	0.05	0
23	0.252	0	0.08	0
24	0.283	0.02	0.11	0
25	0.317	0.11	0.13	0.01621
26	0.356	0.34	0.16	0.11347
27	0.399	0.6	0.18	0.22694
28	0.448	0.8	0.2	0.35662
29	0.502	1	0.23	0.44578
30	0.564	1.15	0.25	0.52683
31	0.632	1.24	0.28	0.57546
32	0.71	1.29	0.3	0.59977
33	0.796	1.29	0.34	0.60788
34	0.893	1.25	0.37	0.58356
35	1.002	1.2	0.42	0.55114
36	1.125	1.15	0.47	0.51872
37	1.262	1.12	0.53	0.49441
38	1.416	1.12	0.6	0.4782
39	1.589	1.16	0.67	0.49441
40	1.783	1.25	0.75	0.53493
41	2	1.36	0.85	0.59167
42	2.244	1.5	0.95	0.67272
43	2.518	1.64	1.06	0.76998
44	2.825	1.78	1.19	0.87534
45	3.17	1.9	1.32	0.98071
46	3.557	2	1.46	1.08608
47	3.991	2.07	1.61	1.18334
48	4.477	2.11	1.76	1.26439
49	5.024	2.11	1.91	1.33733
50	5.637	2.08	2.07	1.39407
51	6.325	2.04	2.21	1.43459
52	7.096	1.98	2.34	1.46701
53	7.962	1.92	2.46	1.48322
54	8.934	1.86	2.55	1.49943
55	10.024	1.8	2.61	1.50754
56	11.247	1.74	2.64	1.51564
57	12.619	1.7	2.64	1.52375
58	14.159	1.67	2.6	1.53996
59	15.887	1.65	2.54	1.55617
60	17.825	1.65	2.46	1.58048
61	20	1.67	2.36	1.6129
62	22.44	1.71	2.25	1.64532
63	25.179	1.78	2.15	1.68585
64	28.251	1.89	2.04	1.71827
65	31.698	2.03	1.95	1.73448
66	35.566	2.2	1.88	1.74258
67	39.905	2.4	1.81	1.71827
68	44.774	2.61	1.76	1.67774
69	50.238	2.83	1.72	1.6129
70	56.368	3.01	1.69	1.53996
71	63.246	3.15	1.69	1.46701
72	70.963	3.21	1.72	1.41838
73	79.621	3.18	1.79	1.41028
74	89.337	3.06	1.92	1.45891
75	100.237	2.84	2.12	1.56427
76	112.468	2.54	2.38	1.74258
77	126.191	2.18	2.67	1.96953
78	141.589	1.79	2.98	2.22078
79	158.866	1.39	3.23	2.48014
80	178.25	0.99	3.36	2.69087
81	200	0.65	3.31	2.82055
82	224.404	0.21	3.01	2.80434
83	251.785	0.04	2.45	2.62603
84	282.508	0	1.68	2.2451
85	316.979	0	0.67	2.13973
86	355.656	0	0.07	2.03437
87	399.052	0	0	1.929
88	447.744	0	0	1.87324
89	502.377	0	0	1.82363
90	563.677	0	0	1.71827
91	632.456	0	0	1.6129
92	709.627	0	0	1.50754
93	796.214	0	0	1.45891
94	893.367	0	0	1.41028
95	1002.37	0	0	1.2806
96	1124.68	0	0	1.02124
97	1261.91	0	0	0.82671
98	1415.89	0	0	0.63219
99	1588.66	0	0	0.43767
100	1782.5	0	0	0.24315
101	2000			0
