# Supplementary material for: Trans-scale relationship analysis between the pore structure and macro parameters of backfill and slurry
Source: R Soc Open Sci. 2019 Jun 26;6(6):190389. doi: 10.1098/rsos.190389 (PMC6599773; doi:10.1098/rsos.190389)
Supplement: Trans-scale correlation calculation of the parameters for flowability [file rsos190389supp3.xlsx]

## Sheet: Figure 10's data
Table 3 Trans-scale correlation calculation of the parameters for flowability (Figures 10)
Name	Fractal dimension	Shear stress	Apparent viscosity	Strength	Fractal dimension	Shear stress	Apparent viscosity	Strength
Unit		Pa	Pa·s	Mpa		Pa	Pa·s	Mpa
Comment	A group	A group	A group	A group	B group	B group	B group	B group
1	1.787	81.14	134.4	1.652	1.799	212.2	485.9	1.53
2	1.794	78.28	122.9	1.565	1.794	185.4	426.4	1.245
3	1.828	75.87	110.4	1.555	1.824	171.9	355.1	1.125
4	1.798	71.17	105	1.575	1.794	142.6	321.7	1.39
